# Supplementary material
Source: MDPI journal article supplement (https://www.mdpi.com/2297-8739/10/6/334)

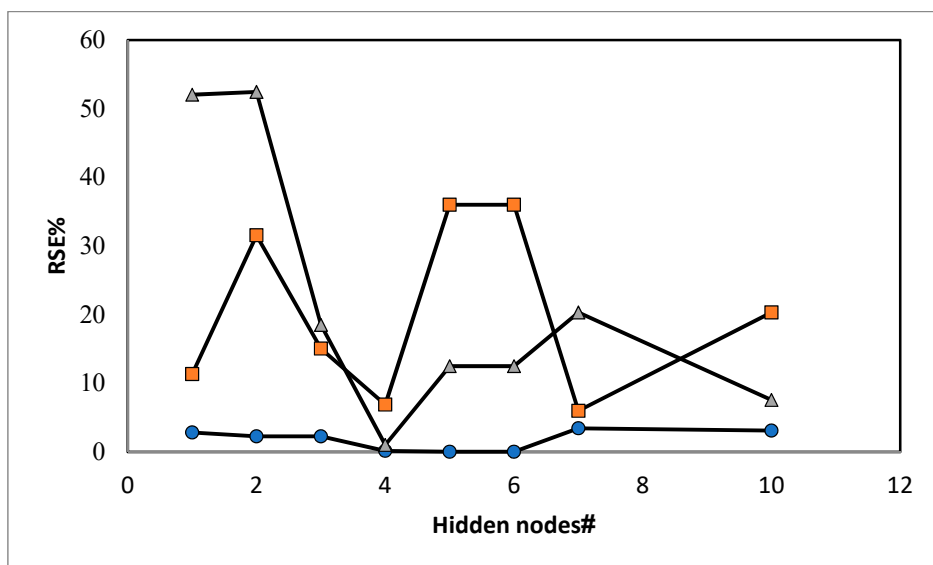

Figure S1 Hidden nodes optimization.

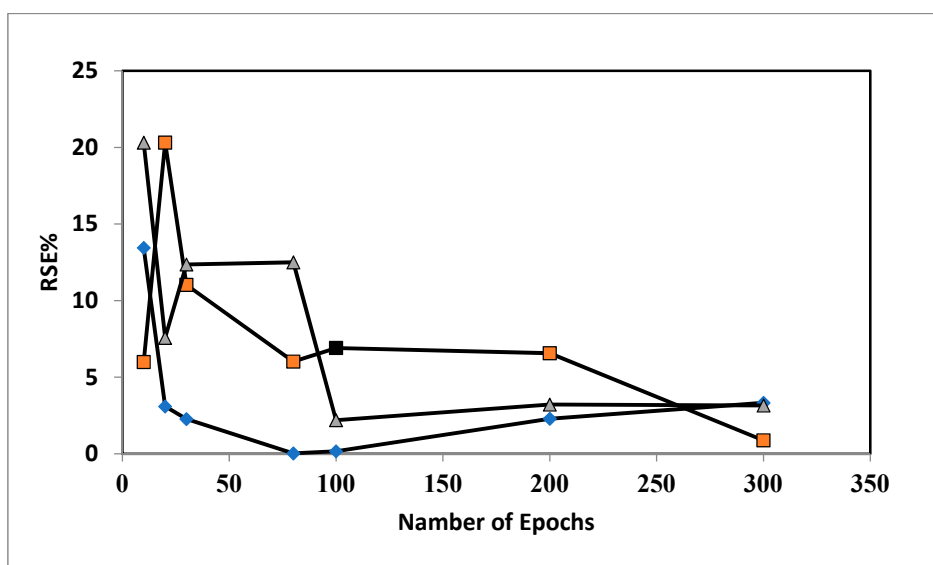

Figure S2 Optimization of number of epochs.

Supplement: s1 [file s1]
